# Supplementary material for: Clinical Manifestations of Human Exposure to Fungi
Source: MDPI journal article supplement (doi:10.3390/jof9030381), 2023-03-21
Supplement: s1 [file s1]

**Table S1.** Fungal allergens approved by the International Allergen Nomenclature Sub-committee (except for a contact exposure for *Trichophyton* spp. and *Malassezia* spp., all allergens are associated with airway exposure) (adapted from <http://www.allergen.org/>, accessed on 16 January 2023).

| Phylum     | Species                      | Allergen  | Biochemical name                              | MW (SDS-PAGE)     |
|------------|------------------------------|-----------|-----------------------------------------------|-------------------|
| Ascomycota | <i>Alternaria alternata</i>  | Alt a 1   |                                               | 16.4 and 15.3 kDa |
|            |                              | Alt a 3   | Heat shock protein 70                         |                   |
|            |                              | Alt a 4   | Disulfide isomerase                           | 57 kDa            |
|            |                              | Alt a 5   | Ribosomal protein P2                          | 11 kDa            |
|            |                              | Alt a 6   | Enolase                                       | 45 kDa            |
|            |                              | Alt a 7   | YCP4 protein                                  | 22 kDa            |
|            |                              | Alt a 8   | Mannitol dehydrogenase                        | 29 kDa            |
|            |                              | Alt a 10  | Aldehyde dehydrogenase                        | 53 kDa            |
|            |                              | Alt a 12  | Acid ribosomal protein P1                     | 11 kDa            |
|            |                              | Alt a 13  | Glutathione-S-transferase                     | 26 kDa            |
|            |                              | Alt a 14  | Manganese superoxide dismutase                | 24 kDa            |
|            |                              | Alt a 15  | Serine protease                               | 58 kDa            |
|            | <i>Aspergillus flavus</i>    | Asp fl 13 | Alkaline serine protease                      | 34 kDa            |
|            | <i>Aspergillus fumigatus</i> | Asp f 1   | Mitogillin family                             | 18 kDa            |
|            |                              | Asp f 2   |                                               | 37 kDa            |
|            |                              | Asp f 3   | Peroxisomal protein                           | 19 kDa            |
|            |                              | Asp f 4   |                                               | 30 kDa            |
|            |                              | Asp f 5   | Metalloprotease                               | 40 kDa            |
|            |                              | Asp f 6   | Mn superoxide dismutase                       | 26.5 kDa          |
|            |                              | Asp f 7   |                                               | 12 kDa            |
|            |                              | Asp f 8   | Ribosomal protein P2                          | 11 kDa            |
|            |                              | Asp f 9   |                                               | 34 kDa            |
|            |                              | Asp f 10  | Aspartate protease                            | 34 kDa            |
|            |                              | Asp f 11  | Peptidyl-prolyl isomerase                     | 24 kDa            |
|            |                              | Asp f 12  | Heat shock protein P90                        | 90 kDa            |
|            |                              | Asp f 13  | Alkaline serine protease                      | 34 kDa            |
|            |                              | Asp f 15  |                                               | 16 kDa            |
|            |                              | Asp f 16  |                                               | 43 kDa            |
|            |                              | Asp f 17  |                                               | 27 kDa            |
|            |                              | Asp f 18  | Vacuolar serine protease                      | 34 kDa            |
|            |                              | Asp f 19  | HSP 70                                        | 69.4 kDa          |
|            |                              | Asp f 22  | Enolase                                       | 46 kDa            |
|            |                              | Asp f 23  | L3 ribosomal protein                          | 44 kDa            |
|            |                              | Asp f 24  | EF1B Elongation factor                        | 34 kDa            |
|            |                              | Asp f 27  | Cyclophilin                                   | 18 kDa            |
|            |                              | Asp f 28  | Thioredoxin                                   | 13 kDa            |
|            |                              | Asp f 29  | Thioredoxin                                   | 13 kDa            |
|            |                              | Asp f 34  | PhiA cell wall protein                        | 20 kDa            |
|            |                              | Asp f 35  | Cu-Zn Superoxide dismutase similar to Ole e 5 | 21 kDa            |
|            |                              | Asp f 36  | Fructose-bisphosphate aldolase                | 42 kDa            |
|            |                              | Asp f 37  | Malate dehydrogenase NAD-dependent            | 35 kDa            |
|            |                              | Asp f 38  | Uncharacterized Protein                       | 25 kDa            |
|            |                              | Asp f 39  | FG-GAP repeat protein                         | 35 kDa            |
|            | <i>Aspergillus niger</i>     | Asp n 14  | Beta-xylosidase                               | 105 kDa           |

|                                     |           |                                                          |            |
|-------------------------------------|-----------|----------------------------------------------------------|------------|
|                                     | Asp n 18  | Vacuolar serine protease                                 | 34 kDa     |
|                                     | Asp n 25  | 3-phytase B                                              | 66-100 kDa |
| <i>Aspergillus oryzae</i>           | Asp o 13  | Alkaline serine protease                                 | 34 kDa     |
|                                     | Asp o 21  | TAKA-amylase A                                           | 53 kDa     |
| <i>Aspergillus terreus</i>          | Asp t 36  | Triosephosphate isomerase                                | 28 kDa     |
| <i>Aspergillus versicolor</i>       | Asp v 13  | Extracellular alkaline serine protease                   | 43 kDa     |
| <i>Candida albicans</i>             | Cand a 1  | Alcohol dehydrogenase                                    | 40 kDa     |
|                                     | Cand a 3  | Peroxisomal protein                                      | 20 kDa     |
| <i>Candida boidinii</i>             | Cand b 2  | Peroxisomal membrane protein A                           | 20 kDa     |
| <i>Cladosporium cladosporioides</i> | Cla c 9   | Vacuolar serine protease                                 | 36 kDa     |
|                                     | Cla c 14  | Transaldolase                                            | 36.5 kDa   |
| <i>Cladosporium herbarum</i>        | Cla h 2   |                                                          | 23 kDa     |
|                                     | Cla h 5   | Acid ribosomal protein P2                                | 11 kDa     |
|                                     | Cla h 6   | Enolase                                                  | 46 kDa     |
|                                     | Cla h 7   | YCP4 protein                                             | 22 kDa     |
|                                     | Cla h 8   | Mannitol dehydrogenase                                   | 28 kDa     |
|                                     | Cla h 9   | Vacuolar serine protease                                 | 45 kDa     |
|                                     | Cla h 10  | Aldehyde dehydrogenase                                   | 53 kDa     |
|                                     | Cla h 12  | Acid ribosomal protein P1                                | 11 kDa     |
| <i>Curvularia lunata</i>            | Cur l 1   | Serine protease                                          | 31 kDa     |
|                                     | Cur l 2   | Enolase                                                  | 48 kDa     |
|                                     | Cur l 3   | Cytochrome c                                             | 12 kDa     |
|                                     | Cur l 4   | Subtilisin like serine protease                          | 54 kDa     |
| <i>Epicoccum purpurascens</i>       | Epi p 1   | Serine protease                                          | 30 kDa     |
| <i>Fusarium culmorum</i>            | Fus c 1   | Ribosomal protein P2                                     | 11 kDa     |
|                                     | Fus c 2   | Thioredoxin-like protein                                 | 13 kDa     |
| <i>Fusarium proliferatum</i>        | Fus p 4   | Transaldolase                                            | 37.5 kDa   |
|                                     | Fus p 9   | Vacuolar serine protease                                 | 36.5 kDa   |
| <i>Penicillium brevicompactum</i>   | Pen b 13  | Alkaline serine protease                                 | 33 kDa     |
|                                     | Pen b 26  | Acidic ribosomal prot. P1                                | 11 kDa     |
| <i>Penicillium chrysogenum</i>      | Pen ch 13 | Alkaline serine protease                                 | 34 kDa     |
|                                     | Pen ch 18 | Vacuolar serine protease                                 | 32 kDa     |
|                                     | Pen ch 20 | N-acetyl-glucosaminidase                                 | 68 kDa     |
|                                     | Pen ch 31 | Calreticulin                                             |            |
|                                     | Pen ch 33 |                                                          | 16 kDa     |
|                                     | Pen ch 35 | Transaldolase                                            | 36.5 kDa   |
| <i>Penicillium citrinum</i>         | Pen c 3   | Peroxisomal membrane protein                             | 18 kDa     |
|                                     | Pen c 13  | Alkaline serine protease                                 | 33 kDa     |
|                                     | Pen c 19  | Heat shock protein P70                                   | 70 kDa     |
|                                     | Pen c 22  | Enolase                                                  | 46 kDa     |
|                                     | Pen c 24  | elongation factor 1 beta                                 | 25 kDa     |
|                                     | Pen c 30  | Catalase                                                 | 97 kDa     |
|                                     | Pen c 32  | Pectate lyase                                            | 40 kDa     |
| <i>Penicillium crustosum</i>        | Pen cr 26 | 60S acidic ribosomal phosphoprotein P1                   | 11 kDa     |
| <i>Penicillium oxalicum</i>         | Pen o 18  | Vacuolar serine protease                                 | 34 kDa     |
| <i>Stachybotrys chartarum</i>       | Sta c 3   | Extracellular alkaline Mg-dependent exodeoxyribonuclease | 21 kDa     |
| <i>Trichophyton rubrum</i>          | Tri r 2   | Putative secreted alkaline protease Alp1                 | 29 kDa     |
|                                     | Tri r 4   | Serine protease                                          | 85 kDa     |

|               |                                 |           |                                               |          |
|---------------|---------------------------------|-----------|-----------------------------------------------|----------|
| Basidiomycota | <i>Trichophyton tonsurans</i>   | Tri t 1   |                                               | 30 kDa   |
|               |                                 | Tri t 4   | Serine protease                               | 83 kDa   |
|               | <i>Ulocladium chartarum</i>     | Ulo c 1   | Alt a 1 homologue                             | 17 kDa   |
|               | <i>Coprinus comatus</i>         | Cop c 1   | Leucine zipper protein                        | 11 kDa   |
|               |                                 | Cop c 2   | Thioredoxin                                   | 12 kDa   |
|               |                                 | Cop c 3   |                                               | 37 kDa   |
|               |                                 | Cop c 5   |                                               | 16 kDa   |
|               |                                 | Cop c 7   |                                               | 16 kDa   |
|               | <i>Malassezia furfur</i>        | Mala f 2  | Peroxisomal membrane protein                  | 21 kDa   |
|               |                                 | Mala f 3  | Peroxisomal membrane protein                  | 20 kDa   |
|               |                                 | Mala f 4  | Mitochondrial malate dehydrogenase            | 35 kDa   |
|               | <i>Malassezia sympodialis</i>   | Mala s 1  |                                               | 37 kDa   |
|               |                                 | Mala s 5  |                                               | 18 kDa   |
|               |                                 | Mala s 6  | Cyclophilin                                   | 17 kDa   |
|               |                                 | Mala s 7  |                                               | 16 kDa   |
|               |                                 | Mala s 8  |                                               | 19 kDa   |
|               |                                 | Mala s 9  |                                               | 36.7 kDa |
|               |                                 | Mala s 10 | heat shock protein 70                         | 86 kDa   |
|               |                                 | Mala s 11 | manganese superoxide dismutase                | 23 kDa   |
|               |                                 | Mala s 12 | glucose-methanol-choline (GMC) oxidoreductase | 67 kDa   |
|               |                                 | Mala s 13 | Thioredoxin                                   | 13 kDa   |
|               | <i>Psilocybe cubensis</i>       | Psi c 1   |                                               |          |
|               |                                 | Psi c 2   | Cyclophilin                                   | 16 kDa   |
|               | <i>Rhodotorula mucilaginosa</i> | Rho m 1   | Enolase                                       | 47 kDa   |
|               |                                 | Rho m 2   | vacuolar serine protease                      | 31 kDa   |
|               | <i>Schizophyllum commune</i>    | Sch c 1   | Glucoamylase                                  | 61 kDa   |
| Zygomycota    | <i>Rhizopus oryzae</i>          | Rhi o 1   | Aspartyl endopeptidase                        | 44 kDa   |
|               |                                 | Rhi o 2   | Cyclophilin                                   | 18 kDa   |

**Table S2.** Overview of the most common fungal infections.

| Type                   | Infection             | Etiological agent                          | Risk factors                                                                                 | Transmission                                                                                                          | Clinical manifestations                                                                                                                               | Diagnosis                                                                    | Treatment                                                                                                                                                                          |
|------------------------|-----------------------|--------------------------------------------|----------------------------------------------------------------------------------------------|-----------------------------------------------------------------------------------------------------------------------|-------------------------------------------------------------------------------------------------------------------------------------------------------|------------------------------------------------------------------------------|------------------------------------------------------------------------------------------------------------------------------------------------------------------------------------|
| Superficial infections | Dermatophytosis       | Dermatophytes                              | Age<br>Gender<br>Other medical conditions                                                    | Transfer through shared surfaces and equipment<br>Contact with animals<br>Fungal persistence in household environment | Alopecia<br>Desquamation<br>Edema<br>Erythema<br>Pruritus<br>Purulent exudate                                                                         | Medical and travel history<br>Symptoms<br>Physical examinations<br>Lab tests | Antifungal medication (azoles, allylamine, epigallocatechin 3-O-gallate)<br>Plant essential oils<br>Nail removal                                                                   |
|                        | Oral candidiasis      | <i>Candida</i> spp.                        | Age<br>Gender<br>Medication<br>Other medical conditions                                      | Direct or indirect contact with contaminated people, objects, or surfaces                                             | Ageusia<br>Angular cheilitis<br>Bleeding<br>Denture stomatitis<br>Edema<br>Erythema<br>Leukoplakia<br>Paresthesia<br>Pruritus<br>Thrush<br>Xerostomia | Medical history<br>Symptoms<br>Physical examinations<br>Lab tests            | Antifungal medication (azoles)<br>Topic medication (nystatin)<br>Plant essential oils<br>Phytochemicals                                                                            |
|                        | Vaginal candidiasis   | <i>Candida</i> spp.                        | Medication<br>Other medical conditions<br>Behavioral aspects                                 | Direct or indirect contact with contaminated people or objects                                                        | Edema<br>Erythema<br>Dyspareunia<br>Dysuri<br>Odorless vaginal discharge with a cottage cheese appearance<br>Paresthesia<br>Pruritus<br>Vulvodynia    | Medical history<br>Symptoms<br>Physical examinations<br>Lab tests            | Antifungal medication (azoles)<br>Topic medication (boric acid, nystatin, flucytosine)<br>Other medications (ibrexafungerp, spilanthol, atorvastatin, probiotics, p-Coumaric acid) |
|                        | Candida balanitis     | <i>C. albicans</i> +++<br><i>C. krusei</i> | Age<br>Presence of foreskin<br>Medications<br>Other medical conditions<br>Behavioral aspects | Direct or indirect contact with contaminated people or objects                                                        | Edema<br>Dysuria<br>Inflammation<br>Phimosis<br>Pruritus<br>Smegma<br>Soreness<br>Tight, shiny skin on the glans                                      | Medical history<br>Symptoms<br>Physical examinations<br>Lab tests            | Antifungal medication (azoles)<br>Topic medication (azoles, nystatin)<br>Circumcision                                                                                              |
|                        | Pityriasis versicolor | <i>Malassezia</i> spp.                     | Other medical conditions<br>Behavioral aspects<br>Environmental exposure                     | Outgrows of natural skin populations                                                                                  | Hyperpigmented and hypopigmented macules<br>Pruritus<br>Scaling                                                                                       | Medical history<br>Symptoms<br>Physical examinations<br>Lab tests            | Antifungal medication (azoles, terbinafine)<br>Topical medication (pyrithione zinc, selenium sulfide,                                                                              |

|                         |                                     |                                                                                                                                                                                                            |                                                                                                                 |                                                                                                                                |                                                                                                                                                                                     |                                                                                                    |                                                                                                                            |
|-------------------------|-------------------------------------|------------------------------------------------------------------------------------------------------------------------------------------------------------------------------------------------------------|-----------------------------------------------------------------------------------------------------------------|--------------------------------------------------------------------------------------------------------------------------------|-------------------------------------------------------------------------------------------------------------------------------------------------------------------------------------|----------------------------------------------------------------------------------------------------|----------------------------------------------------------------------------------------------------------------------------|
|                         |                                     |                                                                                                                                                                                                            |                                                                                                                 |                                                                                                                                |                                                                                                                                                                                     |                                                                                                    | sulfur associated with salicylic acid)                                                                                     |
| Subcutaneous infections | Eumycetoma                          | <i>M. mycetomatis</i> ++<br><i>M. grisea</i> ++<br><i>P. boydii</i> ++<br><i>L. senegalensis</i> ++<br><i>C. lunata</i> ++<br><i>N. rosatii</i> ++<br><i>Acremonium spp.</i> ++<br><i>Fusarium spp.</i> ++ | Age<br>Gender<br>Other medical conditions<br>Environmental exposure                                             | Fungal spores enter the body through skin injuries<br>No person-to-person transmission                                         | Painless nodules<br>Limb deformation<br>Destruction of muscular and osseous tissue                                                                                                  | Medical and travel history<br>Symptoms<br>Physical examinations<br>Lab tests<br>Imagological tests | Antifungal medication (azole)<br>Plant essential oils<br>Surgery<br>Amputation                                             |
|                         | Chromoblastomycosis                 | <i>Fonsecaea</i> spp.<br><i>Cladophialophora</i> spp.<br><i>P. verrucosa</i><br><i>Rhinocladiella</i> spp.<br><i>C. ludoviensis</i>                                                                        | Age<br>Gender<br>Other medical conditions<br>Environmental exposure                                             | Fungal spores enter the body through skin injuries                                                                             | Moriform bodies                                                                                                                                                                     | Medical and travel history<br>Symptoms<br>Physical examinations<br>Lab tests                       | Antifungal medication (azoles)<br>Surgery<br>Cryotherapy<br>Thermotherapy<br>CO <sub>2</sub> laser<br>Photodynamic therapy |
| Systemic infections     | Aspergillosis                       | <i>A. fumigatus</i> +++<br><i>A. niger</i><br><i>A. terreus</i><br><i>A. nidulans</i><br><i>A. oryzae</i>                                                                                                  | Medications<br>Other medical conditions<br>Behavioral factors                                                   | Inhalation of spores<br>No person-to-person transmission                                                                       | Arthralgia<br>Cephalalgia<br>Chills<br>Chest pain<br>Cough with hemoptysis                                                                                                          | Medical history<br>Symptoms<br>Physical examinations<br>Lab test                                   | Oral corticosteroids<br>Antifungal medication (polyenes, azoles, echinocandins)<br>Surgery                                 |
|                         | Aspergilloma                        | <i>A. fumigatus</i> +++                                                                                                                                                                                    |                                                                                                                 |                                                                                                                                | Dry cough<br>Dyspnea<br>Eye symptoms<br>Fatigue<br>Fever<br>Skin lesions<br>Weight loss<br>Wheezing                                                                                 | Imagological test                                                                                  | Embolization                                                                                                               |
|                         | Candidemia and invasive candidiasis | <i>Candida</i> spp.                                                                                                                                                                                        | Medication<br>Other medical conditions<br>Long hospital stays<br>Abdominal surgery<br>Implanted medical devices | Candida gets into the bloodstream, causing candidemia<br>Healthcare-associated infection.<br>No person-to-person transmission. | Abdominal pain<br>Cephalalgia<br>Chills<br>Fatigue<br>Fever<br>Light sensitivity<br>Low blood pressure<br>Memory loss<br>Mental confusion<br>Myalgia<br>Skin rash<br>Vision changes | Medical history<br>Symptoms<br>Physical examinations<br>Lab tests                                  | Antifungal medication (polyenes, azoles, echinocandins, triterpenoids)                                                     |
|                         | Cryptococcosis                      | <i>C. neoformans</i> +++<br><i>C. gattii</i>                                                                                                                                                               | Age<br>Medication<br>Other medical conditions<br>Behavioral factors<br>Environmental exposure                   | Inhalation of spores<br>No person-to-person transmission                                                                       | Behavioral changes<br>Cephalalgia<br>Cervicalgia<br>Chest pain<br>Chills                                                                                                            | Medical history<br>Symptoms<br>Physical examinations<br>Lab tests                                  | Antifungal medication (polyenes, azoles)                                                                                   |

|                    |                                             |                                                                                 |                                                          |                                                                                                                                                                                                                  |                                                                                                  |                                                                        |
|--------------------|---------------------------------------------|---------------------------------------------------------------------------------|----------------------------------------------------------|------------------------------------------------------------------------------------------------------------------------------------------------------------------------------------------------------------------|--------------------------------------------------------------------------------------------------|------------------------------------------------------------------------|
|                    |                                             |                                                                                 |                                                          | Cough<br>Cough with hemoptysis<br>Dyspnea<br>Fever<br>Malaise<br>Mental confusion<br>Nausea and vomiting<br>Sensitivity to light<br>Sleep hyperhidrosis<br>Weight loss                                           | Imagological test                                                                                |                                                                        |
| Blastomycosis      | <i>Blastomyces</i> spp.                     | Age<br>Gender<br>Other medical conditions<br>Environmental exposure             | Inhalation of spores<br>No person-to-person transmission | Anorexia<br>Chest pain<br>Chills<br>Fever<br>Myalgia<br>Sleep hyperhidrosis<br>Dyspnea<br>Cough<br>Cough with hemoptysis<br>Fatigue<br>Weight loss                                                               | Medical and travel history<br>Symptoms<br>Physical examinations, Lab tests<br>Imagological tests | Antifungal medication (polyenes, azoles)                               |
| Coccidioidomycosis | <i>C. immitis</i> ++<br><i>C. posadasii</i> | Age<br>Race<br>Medication<br>Other medical conditions<br>Environmental exposure | Inhalation of spores<br>No person-to-person transmission | Arthralgia<br>Blood-tinged sputum<br>Cephalalgia<br>Chest pain<br>Chills<br>Cough<br>Dyspnea<br>Fatigue<br>Fever<br>Myalgia<br>Nodules in the lungs<br>Red and spotty rash<br>Sleep hyperhidrosis<br>Weight loss | Medical history<br>Symptoms<br>Physical examinations<br>Lab tests                                | Antifungal medication (polyenes, azoles, echinocandins, triterpenoids) |
| Histoplasmosis     | <i>H. capsulatum</i> ++                     | Age<br>Medication<br>Other medical conditions<br>Environmental exposure         | Inhalation of spores<br>No person-to-person transmission | Arthralgia<br>Cephalalgia<br>Chest pain<br>Chills<br>Cough<br>Fatigue<br>Fever<br>Myalgia                                                                                                                        | Medical history<br>Symptoms<br>Physical examinations<br>Lab tests<br>Imagological test           | Antifungal medication (polyenes, azoles)                               |
| Emergomycosis      | <i>Emergomycetes</i> spp.                   | Medication<br>Other medical conditions                                          | Inhalation of spores                                     | Anemia<br>Ataxia<br>Behavioral changes<br>Cephalalgia                                                                                                                                                            | Medical history<br>Symptoms<br>Physical examinations<br>Lab tests                                | Antifungal medication (polyenes, azoles, echinocandins)                |

|                        |                                |                                                                                          |                                                                                                                |                                                                                                                                                                                                                                                |                                                                                         |                                                         |
|------------------------|--------------------------------|------------------------------------------------------------------------------------------|----------------------------------------------------------------------------------------------------------------|------------------------------------------------------------------------------------------------------------------------------------------------------------------------------------------------------------------------------------------------|-----------------------------------------------------------------------------------------|---------------------------------------------------------|
|                        |                                |                                                                                          |                                                                                                                | Crusted hyperkeratotic plaques<br>Endocervical masses<br>Epistaxis<br>Erythema<br>Lobar atelectasis<br>Mental Confusion<br>Nasal congestion<br>Oroantral fistula<br>Pneumonia<br>Seizure<br>Skin lesions<br>Thrombocytopenia<br>Vision changes |                                                                                         |                                                         |
| Paracoccidioidomycosis | <i>Paracoccidioides</i> spp. + | Age<br>Gender<br>Race<br>Other medical conditions<br>Behavioral factors                  | Inhalation of spores<br>Fungal spores enter the body through skin injuries<br>No person-to-person transmission | Cough<br>Dyspnea<br>Fatigue<br>Fever<br>Hepatosplenomegaly<br>Lymphadenitis<br>Mouth and throat lesions<br>Weight loss                                                                                                                         | Medical history<br>Symptoms<br>Physical examinations<br>Lab tests<br>Imagological tests | Antifungal medication (polyenes, azoles)                |
| Talaromycosis*         | <i>T. marneffei</i> ++         | Other medical conditions                                                                 | Inhalation of spores<br>Fungal spores enter the body through skin injuries                                     | Agitation<br>Anemia<br>Confusion<br>Depressed consciousness<br>Dyspnea<br>Fatigue<br>Fever<br>Hepatosplenomegaly<br>Lymphadenopathy<br>Respiratory and gastrointestinal abnormalities<br>Skin lesions<br>Splenomegaly<br>Weight loss           | Medical history<br>Symptoms<br>Physical examinations<br>Lab tests                       | Antifungal medication (polyenes, azoles)                |
| Fusariosis             | <i>Fusarium</i> spp. ++        | Other medical conditions                                                                 | Fungal spores enter the body through skin injuries                                                             | Fever<br>Myalgia<br>Pneumonia<br>Skin lesions<br>Superficial infection in the feet with lymphangitis<br>Toxic appearance                                                                                                                       | Medical history<br>Symptoms<br>Physical examinations<br>Lab tests                       | Antifungal medication (polyenes, azoles)                |
| Hyalohyphomycosis*     | Hyaline fungi                  | Medication<br>Other medical conditions<br>Abdominal surgery<br>Implanted medical devices | Inhalation of spores<br>Fungal spores enter the body through skin injuries                                     | Anemia<br>Arthralgia<br>Cellulitis<br>Cerebritis                                                                                                                                                                                               | Medical history<br>Symptoms<br>Physical examinations                                    | Antifungal medication (polyenes, azoles, echinocandins) |

|                    |                                                               |                                                                                  |                                                                                                                           |                                                                                                                                                                                                                                                                             |                                                                                            |                                                                                               |
|--------------------|---------------------------------------------------------------|----------------------------------------------------------------------------------|---------------------------------------------------------------------------------------------------------------------------|-----------------------------------------------------------------------------------------------------------------------------------------------------------------------------------------------------------------------------------------------------------------------------|--------------------------------------------------------------------------------------------|-----------------------------------------------------------------------------------------------|
|                    |                                                               | Trauma<br>Burns<br>Environmental exposure                                        | Ingestion of<br>contaminated food<br>products                                                                             | Mental confusion<br>Cough<br>Endophthalmitis<br>Fever<br>Fungemia<br>Hepatosplenomegaly<br>Keratitis<br>Lymphadenopathy<br>Onychomycosis<br>Osteomyelitis<br>Peripheral edema<br>Peritonitis<br>Pneumonia<br>Renal failure<br>Sinusitis<br>Weight loss                      | Lab tests                                                                                  | Topic medication<br>(nystatin)<br>Surgery                                                     |
| Lomentosporiosis   | <i>L. prolificans</i> ++<br>(formerly <i>S. prolificans</i> ) | Medication<br>Other medical conditions<br>Surgery<br>Trauma<br>Behavioral aspect | Inhalation of spores<br>Fungal spores enter<br>the body through<br>skin injuries<br>Near-drowning<br>Nosocomial infection | Arthralgia<br>Brain abscess formation<br>Cough<br>Decreased visual acuity<br>Dyspnea<br>Edema<br>Embolic phenomena<br>Erythema<br>Eye pain<br>Fever<br>Meningitis<br>Meningoencephalitis<br>Pleuritic chest pain<br>Photophobia<br>Visual disturbances                      | Medical history<br>Symptoms<br>Physical<br>examinations<br>Lab tests                       | antifungal medicines<br>(polyenes, azoles,<br>echinocandins)<br>Surgery<br>Hyperbaric chamber |
| Mucormycosis*      | Mucorales ++                                                  | Medication<br>Other medical conditions<br>Behavioral factors                     | Inhalation of spores<br>No person-to-person<br>transmission                                                               | Abdominal pain<br>Cephalalgia<br>Chest pain<br>Coma<br>Cough<br>Dyspnea<br>Fever<br>Gastrointestinal bleeding<br>Lesions on nasal bridge or<br>upper inside of mouth<br>Mental status changes<br>Nasal or sinus congestion<br>Nausea and vomiting<br>One-sided facial edema | Medical history<br>Symptoms<br>Physical<br>examinations<br>Lab tests<br>Imagological tests | Antifungal medication<br>(polyenes, azoles)<br>Surgery                                        |
| Phaeohyphomycosis* | Dematiaceous fungi                                            | Medication<br>Other medical conditions<br>Behavioral factors                     | Inhalation of spores<br>Immersion in<br>freshwater                                                                        | Behavioral changes<br>Cough<br>Dyspnea<br>Fever                                                                                                                                                                                                                             | Medical history<br>Symptoms<br>Physical<br>examinations                                    | Antifungal medication<br>(polyenes, azoles)                                                   |



|                        |                        |                                                                               |                                                                                                                |                                                                                                                                     |                                                                                         |                                                                                        |
|------------------------|------------------------|-------------------------------------------------------------------------------|----------------------------------------------------------------------------------------------------------------|-------------------------------------------------------------------------------------------------------------------------------------|-----------------------------------------------------------------------------------------|----------------------------------------------------------------------------------------|
|                        |                        |                                                                               |                                                                                                                | Gastrointestinal bleeding<br>Mental confusion<br>Nausea and vomiting<br>Seizures<br>Sepsis<br>Skin rashes<br>Ulcers                 | Lab tests                                                                               |                                                                                        |
| Pneumocystis pneumonia | <i>P. jirovecii</i> ++ | Medication<br>Other medical conditions                                        | Healthcare-associated infection.<br>Person-to-person through the air, mainly by droplets.                      | Chest pain<br>Chills<br>Dry cough<br>Dyspnea<br>Fatigue<br>Fever Hypoxemia<br>Respiratory failure                                   | Medical history<br>Symptoms<br>Physical examinations<br>Lab tests<br>Imagological tests | Antifungal medication (trimethoprim in association with sulfamethoxazole)              |
| Sporotrichosis*        | <i>Sporothrix</i> spp. | Age<br>Gender<br>Medication<br>Other medical conditions<br>Behavioral aspects | Fungal spores enter the body through skin injuries<br>Contact with animals<br>No person-to-person transmission | Arthralgia<br>Cephalalgia<br>Chest pain<br>Cough<br>Dyspnea<br>Fever<br>Mental confusion<br>Seizures<br>Skin nodules<br>Weight loss | Medical history<br>Symptoms<br>Physical examinations<br>Lab tests<br>Imagological tests | Antifungal medication (polyenes, azoles, supersaturated potassium iodide, terbinafine) |

**Legend:** BAL=broncho alveolar lavage; BMA= bone marrow aspirate; COPD=chronic obstructive pulmonary disease; CT scan=computerized tomography scan; LNA=lymph node aspirate; \*fungal diseases with both subcutaneous and invasive presentations. According to the Fungal Priority Pathogen List [141], fungi are signaled as critical (+++), high (++) and medium priority species (+).

6  
7  
8  
9  
10
